# Supplementary material for: Uptake of COVID-19 vaccines and associated factors among adults in Uganda: a cross-sectional survey
Source: HighWire-hosted journal article supplement (doi:10.1136/bmjopen-2022-067377), 2023-03-01
Supplement: bmjopen-2022-067377supp001_data_supplement.pdf [file bmjopen-2022-067377supp001_data_supplement.pdf]

## Uptake of COVID-19 vaccines and associated factors among adults in Uganda: a cross-sectional survey

| Question                                                                                                            | Answer                              |                         |
|---------------------------------------------------------------------------------------------------------------------|-------------------------------------|-------------------------|
| MAKERERE SCHOOL OF PUBLIC HEALTH AND MIT GOV/LAB MOBILE SURVEY QUESTIONNAIRE                                        |                                     |                         |
| Phone number used for interview                                                                                     |                                     |                         |
| Did the call go through?                                                                                            | 1                                   | Yes                     |
|                                                                                                                     | 0                                   | No                      |
|                                                                                                                     | -97                                 | DO NOT READ: Refused    |
| Was this the respondent previously interviewed?                                                                     | 1                                   | Yes                     |
|                                                                                                                     | 0                                   | No                      |
|                                                                                                                     | -97                                 | DO NOT READ: Refused    |
| [Insert Consent Text]                                                                                               |                                     |                         |
| Do you voluntarily agree to participate in this survey?                                                             | 1                                   | Yes                     |
|                                                                                                                     | 0                                   | No                      |
|                                                                                                                     | -97                                 | DO NOT READ: Refused    |
| Explain:                                                                                                            |                                     |                         |
| A7. What is your name?                                                                                              |                                     |                         |
| A8. What is your age?                                                                                               |                                     |                         |
| A9. What region do you live in?                                                                                     | 1                                   | North                   |
|                                                                                                                     | 2                                   | East                    |
|                                                                                                                     | 3                                   | Central                 |
|                                                                                                                     | 4                                   | West                    |
|                                                                                                                     | -97                                 | DO NOT READ: Refused    |
| A10. What district do you live in?                                                                                  | [Insert filtered list of districts] |                         |
| A11. Do you live in an urban, rural, or semi-urban area?                                                            | 1                                   | Urban                   |
|                                                                                                                     | 2                                   | Rural                   |
|                                                                                                                     | 3                                   | Semi-urban              |
|                                                                                                                     | -99                                 | DO NOT READ: Don't know |
|                                                                                                                     | -97                                 | DO NOT READ: Refused    |
| A12. Gender of respondent                                                                                           | 1                                   | Female                  |
|                                                                                                                     | 0                                   | Male                    |
| Next, I am going to ask some questions on your awareness and intention to take the COVID-19 vaccine.                |                                     |                         |
| E1. As an adult, have you received a vaccine other than the COVID-19 vaccines? (Hepatitis B, Yellow fever, tetanus) | 1                                   | Yes                     |
|                                                                                                                     | 0                                   | No                      |
|                                                                                                                     | -97                                 | DO NOT READ: Refused    |
| E2. Have you ever been asked to get a vaccine and declined?                                                         | 1                                   | Yes                     |
|                                                                                                                     | 0                                   | No                      |
|                                                                                                                     | -97                                 | DO NOT READ: Refused    |

| Question                                                                                                  | Answer |                                                           |
|-----------------------------------------------------------------------------------------------------------|--------|-----------------------------------------------------------|
| E3. What COVID-19 vaccines have you heard of?<br><i>Do not read options aloud. Select all that apply.</i> | 1      | AstraZeneca                                               |
|                                                                                                           | 2      | Pfizer-BioNTech                                           |
|                                                                                                           | 3      | Moderna                                                   |
|                                                                                                           | 4      | Johnson and Johnson                                       |
|                                                                                                           | 5      | Sinopharm                                                 |
|                                                                                                           | 6      | Sinovac                                                   |
|                                                                                                           | 7      | Sputnik V                                                 |
|                                                                                                           | -96    | Other (Specify)                                           |
|                                                                                                           | 8      | Has heard of COVID-19 vaccine but does not know any names |
|                                                                                                           | 0      | None, has not heard of any COVID-19 vaccine               |
| Other, specify:                                                                                           | -99    | DO NOT READ: Don't Know                                   |
|                                                                                                           | -97    | DO NOT READ: Refused                                      |
|                                                                                                           |        |                                                           |
|                                                                                                           |        |                                                           |
| E4. Have you received the COVID-19 vaccine?<br><i>Read all options aloud</i>                              | 1      | Yes, full dose                                            |
|                                                                                                           | 2      | Yes, incomplete dose                                      |
|                                                                                                           | 0      | No                                                        |
|                                                                                                           | -97    | DO NOT READ: Refused                                      |
| E5. Which vaccine did you receive?<br><i>Do not read options aloud. Select all that apply.</i>            | 1      | AstraZeneca                                               |
|                                                                                                           | 2      | Pfizer-BioNTech                                           |
|                                                                                                           | 3      | Moderna                                                   |
|                                                                                                           | 4      | Johnson and Johnson                                       |
|                                                                                                           | 5      | Sinopharm                                                 |
|                                                                                                           | 6      | Sinovac                                                   |
|                                                                                                           | 7      | Sputnik V                                                 |
|                                                                                                           | -96    | Other (Specify)                                           |
|                                                                                                           | 8      | Has heard of COVID-19 vaccine but does not know any names |
|                                                                                                           | 0      | None, has not heard of any COVID-19 vaccine               |
| Other, specify:                                                                                           | -99    | DO NOT READ: Don't Know                                   |
|                                                                                                           | -97    | DO NOT READ: Refused                                      |
|                                                                                                           |        |                                                           |
|                                                                                                           |        |                                                           |

| Question                                                                                                                          | Answer |                                         |
|-----------------------------------------------------------------------------------------------------------------------------------|--------|-----------------------------------------|
| E6. Why did you receive the COVID-19 vaccine?<br><i>Do not read options aloud. Select all that apply.</i>                         | 1      | To protect self / others from COVID-19  |
|                                                                                                                                   | 2      | High perceived risk of getting COVID-19 |
|                                                                                                                                   | 3      | Travel purposes                         |
|                                                                                                                                   | 4      | Recommendation from health workers      |
|                                                                                                                                   | 5      | Prioritized due to occupation           |
|                                                                                                                                   | 6      | Prioritized due to health               |
|                                                                                                                                   | -96    | Other (Specify)                         |
|                                                                                                                                   | -99    | DO NOT READ: Don't Know                 |
|                                                                                                                                   | -97    | DO NOT READ: Refused                    |
| Other, specify:                                                                                                                   |        |                                         |
| E7. Did you experience any side effects within 7 days following the first dose?                                                   | 1      | Yes                                     |
|                                                                                                                                   | 0      | No                                      |
|                                                                                                                                   | -97    | DO NOT READ: Refused                    |
| E8. Which side effects did you experience following the first dose?<br><i>Do not read options aloud. Select all that apply.</i>   | 1      | Fever                                   |
|                                                                                                                                   | 2      | Fatigue                                 |
|                                                                                                                                   | 3      | Headache                                |
|                                                                                                                                   | 4      | Muscle soreness/pain (myalgia)          |
|                                                                                                                                   | 5      | Allergic reaction                       |
|                                                                                                                                   | 6      | Injection site reaction                 |
|                                                                                                                                   | -96    | Other (Specify)                         |
|                                                                                                                                   | -97    | DO NOT READ: Refused                    |
| Other, specify:                                                                                                                   |        |                                         |
| E9. Did you experience any side effects within 7 days following the second dose?                                                  | 1      | Yes                                     |
|                                                                                                                                   | 0      | No                                      |
|                                                                                                                                   | -97    | DO NOT READ: Refused                    |
| E10. Which side effects did you experience following the second dose?<br><i>Do not read options aloud. Select all that apply.</i> | 1      | Fever                                   |
|                                                                                                                                   | 2      | Fatigue                                 |
|                                                                                                                                   | 3      | Headache                                |
|                                                                                                                                   | 4      | Muscle soreness/pain (myalgia)          |
|                                                                                                                                   | 5      | Allergic reaction                       |
|                                                                                                                                   | 6      | Injection site reaction                 |
|                                                                                                                                   | -96    | Other (Specify)                         |
|                                                                                                                                   | -97    | DO NOT READ: Refused                    |
| Other, specify:                                                                                                                   |        |                                         |

| Question                                                                                                               | Answer |                                          |
|------------------------------------------------------------------------------------------------------------------------|--------|------------------------------------------|
| E11. Why haven't you ever received the COVID-19 vaccine?<br><i>Do not read options aloud. Select all that apply.</i>   | 1      | Safety concerns / fear of adverse events |
|                                                                                                                        | 2      | Doubt vaccine effectiveness              |
|                                                                                                                        | 3      | Do not fear COVID-19 / trust immunity    |
|                                                                                                                        | 4      | Don't know where to access vaccine from  |
|                                                                                                                        | 5      | Religious beliefs                        |
|                                                                                                                        | 6      | COVID-19 is a hoax / politics            |
|                                                                                                                        | 7      | Not among eligible group                 |
|                                                                                                                        | 8      | Not having time                          |
|                                                                                                                        | 9      | Transport costs                          |
|                                                                                                                        | 10     | Cost of vaccine                          |
|                                                                                                                        | 11     | Vaccines are unavailable                 |
|                                                                                                                        | -96    | Other (Specify)                          |
|                                                                                                                        | -99    | DO NOT READ: Don't know                  |
|                                                                                                                        | -97    | DO NOT READ: Refused                     |
| Other, specify:                                                                                                        |        |                                          |
| E12. Do you intend to receive the COVID-19 vaccine if it is available?                                                 | 1      | Yes                                      |
|                                                                                                                        | 0      | No                                       |
|                                                                                                                        | -97    | DO NOT READ: Refused                     |
| E13. Why do you intend to receive the COVID-19 vaccine?<br><i>Do not read options aloud. Select all that apply.</i>    | 1      | To protect self / others from COVID-19   |
|                                                                                                                        | 2      | High perceived risk of getting COVID-19  |
|                                                                                                                        | 3      | Travel purposes                          |
|                                                                                                                        | 4      | Recommendation from health workers       |
|                                                                                                                        | 5      | Prioritized due to occupation            |
|                                                                                                                        | 6      | Prioritized due to health                |
|                                                                                                                        | -96    | Other (Specify)                          |
|                                                                                                                        | -99    | DO NOT READ: Don't Know                  |
|                                                                                                                        | -97    | DO NOT READ: Refused                     |
| Other, specify:                                                                                                        |        |                                          |
| E14. Why don't you intend to receive the COVID-19 vaccine?<br><i>Do not read options aloud. Select all that apply.</i> | 1      | Safety concerns / fear of adverse events |
|                                                                                                                        | 2      | Doubt vaccine effectiveness              |

| Question                                                                                                                     | Answer |                                         |
|------------------------------------------------------------------------------------------------------------------------------|--------|-----------------------------------------|
|                                                                                                                              | 3      | Do not fear COVID-19 / trust immunity   |
|                                                                                                                              | 4      | Don't know where to access vaccine from |
|                                                                                                                              | 5      | Religious beliefs                       |
|                                                                                                                              | 6      | COVID-19 is a hoax / politics           |
|                                                                                                                              | 7      | Not among eligible group                |
|                                                                                                                              | 8      | Not having time                         |
|                                                                                                                              | 9      | Transport costs                         |
|                                                                                                                              | 10     | Cost of vaccine                         |
|                                                                                                                              | 11     | Vaccines are unavailable                |
|                                                                                                                              | -96    | Other (Specify)                         |
|                                                                                                                              | -99    | DO NOT READ: Don't know                 |
|                                                                                                                              | -97    | DO NOT READ: Refused                    |
| Other, specify:                                                                                                              |        |                                         |
| E15. Has anyone in your household received their COVID-19 vaccine?                                                           | 1      | Yes, specify                            |
|                                                                                                                              | 0      | No                                      |
|                                                                                                                              | -99    | DO NOT READ: Don't Know                 |
|                                                                                                                              | -97    | DO NOT READ: Refused                    |
| E16. In your household, who has received their COVID-19 vaccine?<br><i>Do not read options aloud. Select all that apply.</i> | 1      | Parents                                 |
|                                                                                                                              | 2      | Children                                |
|                                                                                                                              | 3      | Grandparents                            |
|                                                                                                                              | 4      | Grandchildren                           |
|                                                                                                                              | 5      | Siblings                                |
|                                                                                                                              | 6      | Cousins                                 |
|                                                                                                                              | 7      | Aunts and Uncles                        |
|                                                                                                                              | 8      | Spouse                                  |
|                                                                                                                              | -96    | Other (Specify)                         |
|                                                                                                                              | -97    | DO NOT READ: Refused                    |
| Other, specify:                                                                                                              |        |                                         |
| E17. Do you know anyone personally in your community who has received their COVID-19 vaccine?                                | 1      | Yes, specify                            |
|                                                                                                                              | 0      | No                                      |
|                                                                                                                              | -99    | DO NOT READ: Don't Know                 |
|                                                                                                                              | -97    | DO NOT READ: Refused                    |

| Question                                                                                                                                                     | Answer |                                     |
|--------------------------------------------------------------------------------------------------------------------------------------------------------------|--------|-------------------------------------|
| E18. Among those you know personally in your community, who has received their COVID-19 vaccine?<br><i>Do not read options aloud. Select all that apply.</i> | 1      | Traditional leaders                 |
|                                                                                                                                                              | 2      | Religious leaders                   |
|                                                                                                                                                              | 3      | Colleagues                          |
|                                                                                                                                                              | 4      | Personal friends                    |
|                                                                                                                                                              | 5      | Neighbors                           |
|                                                                                                                                                              | -96    | Other (Specify)                     |
|                                                                                                                                                              | -97    | DO NOT READ: Refused                |
| Other, specify:                                                                                                                                              |        |                                     |
| Next, I am going to ask some questions about COVIDEX.                                                                                                        |        |                                     |
| E19. Have you ever heard of COVIDEX before?                                                                                                                  | 1      | Yes                                 |
|                                                                                                                                                              | 0      | No                                  |
|                                                                                                                                                              | -97    | DO NOT READ: Refused                |
| E20. Has anyone in your household ever bought or used COVIDEX?                                                                                               | 1      | Yes                                 |
|                                                                                                                                                              | 0      | No                                  |
|                                                                                                                                                              | -99    | DO NOT READ: Don't Know             |
|                                                                                                                                                              | -97    | DO NOT READ: Refused                |
| E21. Personally, how much trust do you have in COVIDEX?<br><i>Read all options aloud</i>                                                                     | 1      | Trust it a great deal               |
|                                                                                                                                                              | 2      | Tend to trust it                    |
|                                                                                                                                                              | 3      | Tend to distrust it                 |
|                                                                                                                                                              | 4      | Distrust it greatly                 |
|                                                                                                                                                              | -99    | DO NOT READ: Not sure or don't know |
|                                                                                                                                                              | -97    | DO NOT READ: Refused                |
| Next, I am going to ask some more questions on COVID-19 vaccines.                                                                                            |        |                                     |
| (Randomize order of F2)                                                                                                                                      |        |                                     |
| F2. If you were offered the COVID-19 <b>AstraZeneca</b> vaccine right now free of cost, would you take the vaccine?<br><i>Read all options aloud</i>         | 1      | Yes                                 |
|                                                                                                                                                              | 0      | No                                  |
|                                                                                                                                                              | -95    | Have not heard of                   |
|                                                                                                                                                              | -97    | DO NOT READ: Refused                |
| F2. If you were offered the COVID-19 <b>Pfizer-BioNTech</b> vaccine right now free of cost, would you take the vaccine?<br><i>Read all options aloud</i>     | 1      | Yes                                 |
|                                                                                                                                                              | 0      | No                                  |
|                                                                                                                                                              | -95    | Have not heard of                   |
|                                                                                                                                                              | -97    | DO NOT READ: Refused                |
| F2. If you were offered the COVID-19 <b>Moderna</b> vaccine right now free of cost, would you take the vaccine?<br><i>Read all options aloud</i>             | 1      | Yes                                 |
|                                                                                                                                                              | 0      | No                                  |
|                                                                                                                                                              | -95    | Have not heard of                   |
|                                                                                                                                                              | -97    | DO NOT READ: Refused                |
| F2. If you were offered the COVID-19 <b>Johnson and Johnson</b> vaccine right now free of cost, would you take the vaccine?<br><i>Read all options aloud</i> | 1      | Yes                                 |
|                                                                                                                                                              | 0      | No                                  |
|                                                                                                                                                              | -95    | Have not heard of                   |
|                                                                                                                                                              | -97    | DO NOT READ: Refused                |

| Question                                                                                                                                           | Answer |                                             |
|----------------------------------------------------------------------------------------------------------------------------------------------------|--------|---------------------------------------------|
| F2. If you were offered the COVID-19 <b>Sinopharm</b> vaccine right now free of cost, would you take the vaccine?<br><i>Read all options aloud</i> | 1      | Yes                                         |
|                                                                                                                                                    | 0      | No                                          |
|                                                                                                                                                    | -95    | Have not heard of                           |
|                                                                                                                                                    | -97    | DO NOT READ: Refused                        |
| F2. If you were offered the COVID-19 <b>Sinovac</b> vaccine right now free of cost, would you take the vaccine?<br><i>Read all options aloud</i>   | 1      | Yes                                         |
|                                                                                                                                                    | 0      | No                                          |
|                                                                                                                                                    | -95    | Have not heard of                           |
|                                                                                                                                                    | -97    | DO NOT READ: Refused                        |
| F2. If you were offered the COVID-19 <b>Sputnik V</b> vaccine right now free of cost, would you take the vaccine?<br><i>Read all options aloud</i> | 1      | Yes                                         |
|                                                                                                                                                    | 0      | No                                          |
|                                                                                                                                                    | -95    | Have not heard of                           |
|                                                                                                                                                    | -97    | DO NOT READ: Refused                        |
| F3. Why would you choose these vaccines?                                                                                                           | 1      | More effective                              |
|                                                                                                                                                    | 2      | Less adverse events                         |
|                                                                                                                                                    | 3      | Used in Western countries                   |
|                                                                                                                                                    | 4      | Trust in source                             |
|                                                                                                                                                    | -96    | Other (Specify)                             |
|                                                                                                                                                    | -99    | DO NOT READ: Don't Know                     |
|                                                                                                                                                    | -97    | DO NOT READ: Refused                        |
| Other, specify                                                                                                                                     |        |                                             |
| F4. If you needed information on vaccines, who in your community would you talk to for advice?                                                     |        |                                             |
| F5. What are your sources of information on COVID-19?<br><i>Do not read options aloud. Select all that apply.</i>                                  | 1      | Family members                              |
|                                                                                                                                                    | 2      | Friends/peers                               |
|                                                                                                                                                    | 3      | Health worker                               |
|                                                                                                                                                    | 4      | Phone (messages and calls)                  |
|                                                                                                                                                    | 5      | Radio                                       |
|                                                                                                                                                    | 6      | Television                                  |
|                                                                                                                                                    | 7      | Church/Mosque                               |
|                                                                                                                                                    | 8      | Community member/village health team member |
|                                                                                                                                                    | 9      | Local leader                                |
|                                                                                                                                                    | 10     | Social media (Facebook, WhatsApp, Twitter)  |
|                                                                                                                                                    | 11     | Internet                                    |
|                                                                                                                                                    | -96    | Other (Specify)                             |
|                                                                                                                                                    | -99    | DO NOT READ: Don't Know                     |
|                                                                                                                                                    | -97    | DO NOT READ: Refused                        |

| Question                                                                                                                  | Answer |                                             |
|---------------------------------------------------------------------------------------------------------------------------|--------|---------------------------------------------|
| Other, specify                                                                                                            |        |                                             |
| F6. Which three sources of information do you trust the most?<br><i>Do not read options aloud. Select all that apply.</i> | 1      | Family members                              |
|                                                                                                                           | 2      | Friends/peers                               |
|                                                                                                                           | 3      | Health worker                               |
|                                                                                                                           | 4      | Phone (messages and calls)                  |
|                                                                                                                           | 5      | Radio                                       |
|                                                                                                                           | 6      | Television                                  |
|                                                                                                                           | 7      | Church/Mosque                               |
|                                                                                                                           | 8      | Community member/village health team member |
|                                                                                                                           | 9      | Local leader                                |
|                                                                                                                           | 10     | Social media (Facebook, WhatsApp, Twitter)  |
|                                                                                                                           | 11     | Internet                                    |
|                                                                                                                           | -96    | Other (Specify)                             |
|                                                                                                                           | -99    | DO NOT READ: Don't Know                     |
|                                                                                                                           | -97    | DO NOT READ: Refused                        |
| Other, specify                                                                                                            |        |                                             |
| F7. Have you ever been tested at a health facility or laboratory and found to have COVID-19?                              | 1      | Yes                                         |
|                                                                                                                           | 0      | No                                          |
|                                                                                                                           | -97    | DO NOT READ: Refused                        |
| F8. Was this COVID infection before or after you received the full dose of the vaccine?                                   | 1      | Before                                      |
|                                                                                                                           | 2      | After                                       |
|                                                                                                                           | 3      | Both                                        |
|                                                                                                                           | -97    | DO NOT READ: Refused                        |
| B1. What is your highest level of education?                                                                              | 1      | No school                                   |
|                                                                                                                           | 2      | Some primary                                |
|                                                                                                                           | 3      | Complete primary                            |
|                                                                                                                           | 4      | Secondary - ordinary                        |
|                                                                                                                           | 5      | Secondary - advanced                        |
|                                                                                                                           | 6      | Tertiary                                    |
|                                                                                                                           | -96    | Other (Specify)                             |
|                                                                                                                           | -97    | DO NOT READ: Refused                        |
| Other, specify                                                                                                            |        |                                             |
| B2. What is your religion?                                                                                                | 1      | Catholic                                    |
|                                                                                                                           | 2      | Anglican                                    |
|                                                                                                                           | 3      | Born Again/Pentecostal                      |
|                                                                                                                           | 4      | Muslim                                      |
|                                                                                                                           | -96    | Other (Specify)                             |
|                                                                                                                           | -97    | DO NOT READ: Refused                        |



| Question                                                                             | Answer |                         |
|--------------------------------------------------------------------------------------|--------|-------------------------|
| Other, specify                                                                       |        |                         |
| B3. On average, how much money do you earn per month?<br><i>In Ugandan Shillings</i> | 1      | under 50,000            |
|                                                                                      | 2      | 50,001 - 100,000        |
|                                                                                      | 3      | 100,001 - 200,000       |
|                                                                                      | 4      | 200,001 - 500,000       |
|                                                                                      | 5      | 500,001 - 1,000,000     |
|                                                                                      | 6      | 1,000,001 and above     |
|                                                                                      | -97    | DO NOT READ: Refused    |
| B4. Does your household have a <b>television</b> ?                                   | 1      | Yes                     |
|                                                                                      | 0      | No                      |
|                                                                                      | -99    | DO NOT READ: Don't Know |
|                                                                                      | -97    | DO NOT READ: Refused    |
| B4. Does your household have <b>electricity</b> ?                                    | 1      | Yes                     |
|                                                                                      | 0      | No                      |
|                                                                                      | -99    | DO NOT READ: Don't Know |
|                                                                                      | -97    | DO NOT READ: Refused    |
| B4. Does your household have a <b>computer</b> ?                                     | 1      | Yes                     |
|                                                                                      | 0      | No                      |
|                                                                                      | -99    | DO NOT READ: Don't Know |
|                                                                                      | -97    | DO NOT READ: Refused    |
| B4. Does your household have a <b>sofa set</b> ?                                     | 1      | Yes                     |
|                                                                                      | 0      | No                      |
|                                                                                      | -99    | DO NOT READ: Don't Know |
|                                                                                      | -97    | DO NOT READ: Refused    |
| B4. Does your household have a <b>refrigerator</b> ?                                 | 1      | Yes                     |
|                                                                                      | 0      | No                      |
|                                                                                      | -99    | DO NOT READ: Don't Know |
|                                                                                      | -97    | DO NOT READ: Refused    |
| B5. Does anyone in your household own a <b>cassette/CD/DVD player</b> ?              | 1      | Yes                     |
|                                                                                      | 0      | No                      |
|                                                                                      | -99    | DO NOT READ: Don't Know |
|                                                                                      | -97    | DO NOT READ: Refused    |

|                                                                        |    |                              |
|------------------------------------------------------------------------|----|------------------------------|
| B6A. What is your current occupation?<br><i>Read all options aloud</i> | 1  | Unemployed/retiree/housewife |
|                                                                        | 2  | Employed                     |
|                                                                        | 3  | Self-employed                |
|                                                                        | 4  | Casual laborer               |
|                                                                        | 5  | Farmer                       |
|                                                                        | -  | Other (Specify)              |
|                                                                        | 96 |                              |
|                                                                        | -  | DO NOT READ: Refused         |
|                                                                        | 97 |                              |
| Other, specify:                                                        |    |                              |
| B7A. How many people stay in your home, currently?                     |    |                              |
